# Supplementary material
Source: PubMed Central journal article supplement (PMC7725598)
Supplement: joces-133-247973-s1.pdf [file joces-133-247973-s1.pdf]

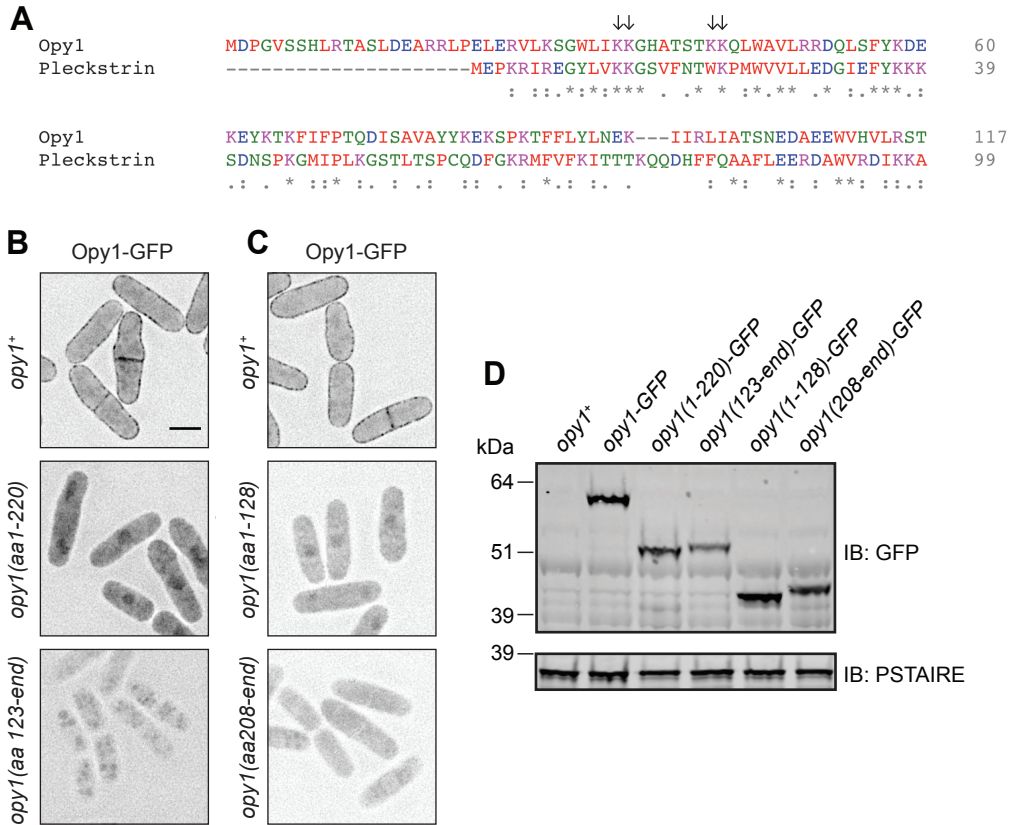

**Figure S1.** (A) Sequence alignment of residues 1-99 of *H. sapiens* pleckstrin and residues 1-117 of *S. pombe* Opy1 generated by Clustal Omega (Madeira et al., 2019). Asterisks denote residues that are conserved; colons denote groups with strongly similar qualities; periods denote groups with weakly similar qualities. Red = small + hydrophobic residues; blue = acidic residues; magenta = basic residues; green = hydroxyl + sulfhydryl + amine + G residues. Arrows indicate the Opy1 residues implicated in PI(4,5)P2 binding (Harlan et al., 1995). (B-C) Representative live-cell images of Opy1-GFP in indicated genotypes. Scale bar = 5  $\mu$ m. (D) Western blot of the indicated GFP-fusions, IB = immunoblot.

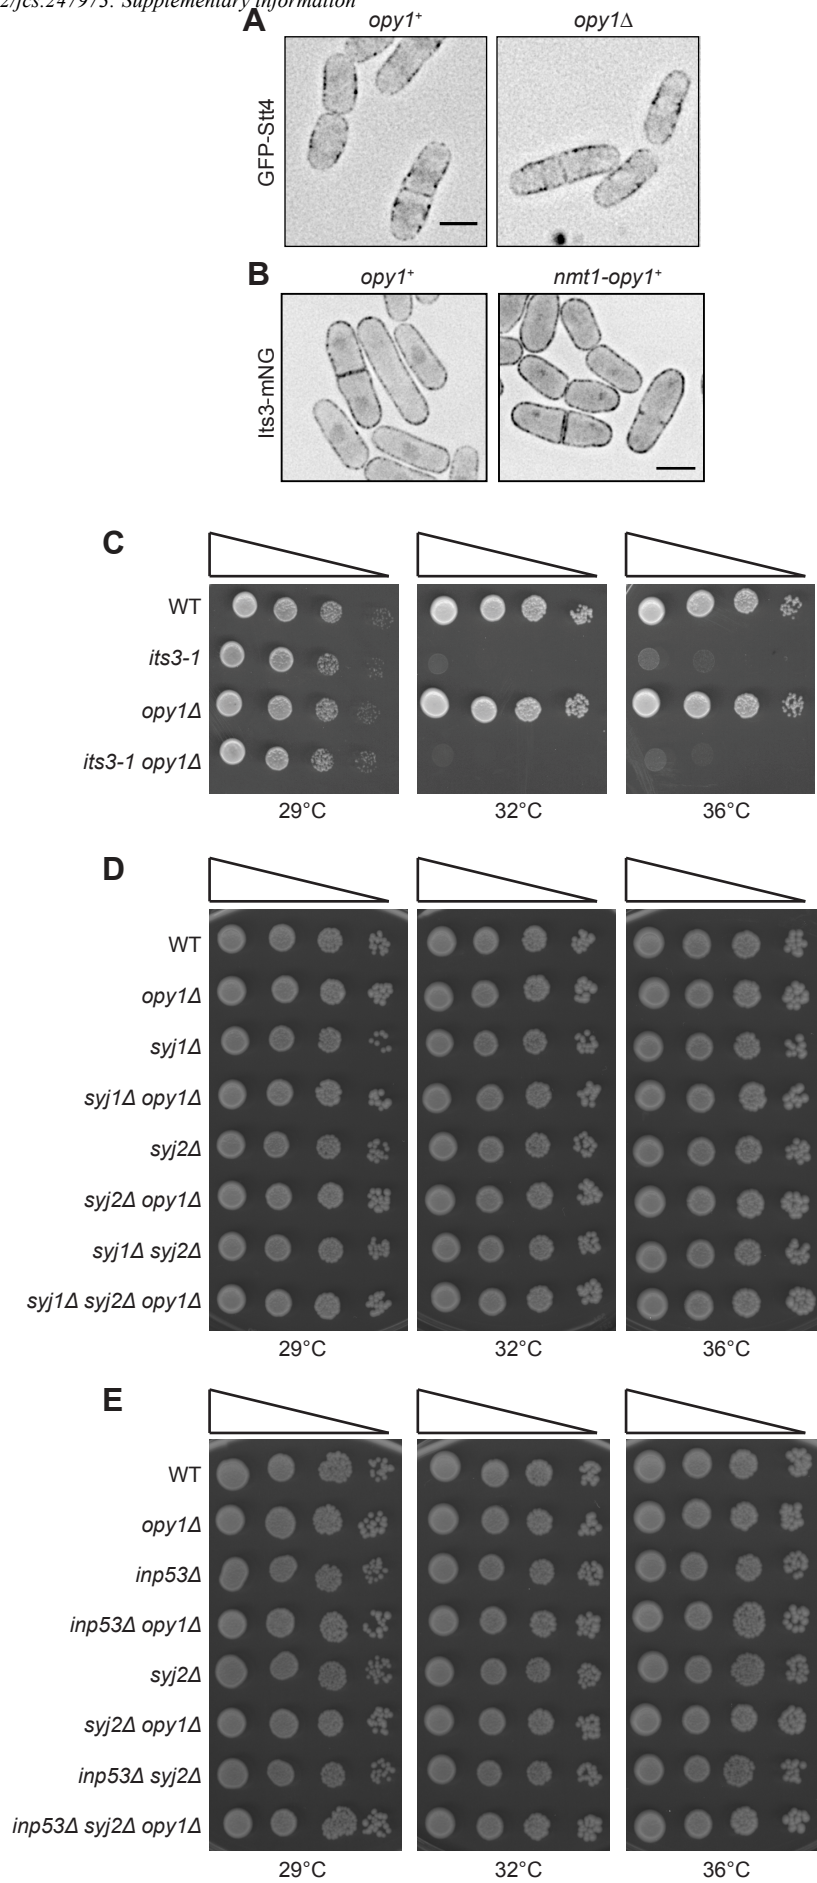

**Figure S2.** (A) Representative live-cell images of GFP-Stt4 in cells of the indicated genotypes. Scale bar = 5  $\mu$ m. (B) Representative images of Irs3-mNG in wild type (*opy1+*) or in cells over-producing *opy1* from the *nmt1* promoter (*nmt1-opy1+*) after 24 hours in media lacking thiamine. Scale bar = 5  $\mu$ m. (C-E) Growth assay of indicated strains at the indicated temperatures on YE.

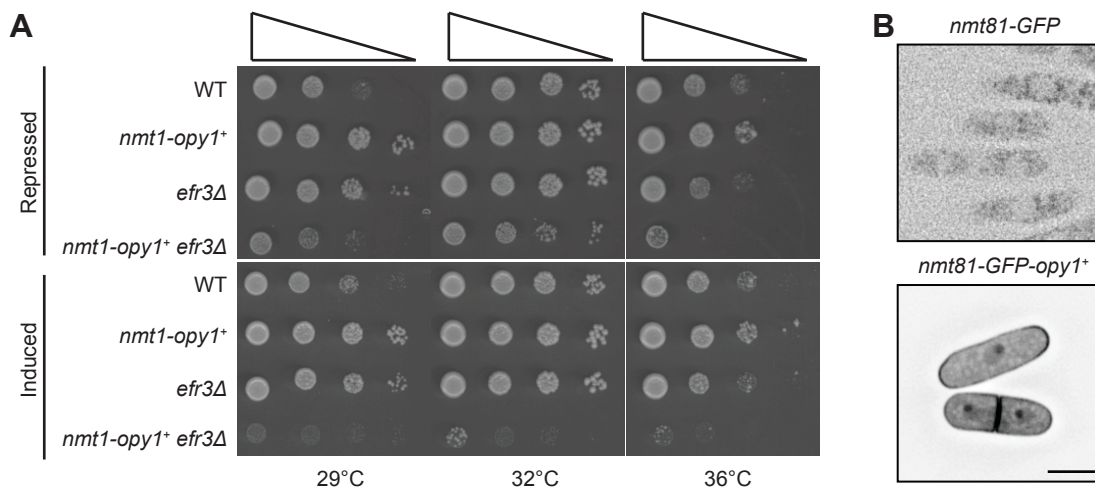

**Figure S3.** (A) Growth assay of indicated strains at the indicated temperatures on plates containing (repressed) or lacking (induced) thiamine. (B) Representative images showing localization of overexpressed GFP-Opy1. Prior to imaging, overexpression was induced in cells carrying either empty vector (*nmt81-GFP*) or a GFP-Opy1 overexpression vector (*nmt81-GFP-opy1+*) for 24 hours in media lacking thiamine. Images are not scaled identically due to the difference in signal. Scale bar = 5 μm.

**Table S1. *S. pombe* strains used in this study**

| Strain number | Genotype                                                                                                                                       | Source     |
|---------------|------------------------------------------------------------------------------------------------------------------------------------------------|------------|
| KGY19319      | <i>opy1</i> -GFP: <i>kan</i> <sup>R</sup> <i>ade6</i> -M210 <i>ura4</i> -D18 <i>leu1</i> -32 h-                                                | This study |
| KGY19335      | <i>opy1(aa1-220)</i> -GFP: <i>kan</i> <sup>R</sup> <i>ade6</i> -M210 <i>ura4</i> -D18 <i>leu1</i> -32 h-                                       | This study |
| KGY19412      | <i>opy1(123-end)</i> -GFP: <i>kan</i> <sup>R</sup> <i>ade6</i> -M210 <i>ura4</i> -D18 <i>leu1</i> -32 h-                                       | This study |
| KGY19413      | <i>opy1(aa1-128)</i> -GFP: <i>kan</i> <sup>R</sup> <i>ade6</i> -M210 <i>ura4</i> -D18 <i>leu1</i> -32 h-                                       | This study |
| KGY19414      | <i>opy1(aa208-end)</i> -GFP: <i>kan</i> <sup>R</sup> <i>ade6</i> -M210 <i>ura4</i> -D18 <i>leu1</i> -32 h-                                     | This study |
| KGY2810-2     | <i>opy1(K34N K35N K42N K43N)</i> -GFP: <i>kan</i> <sup>R</sup> <i>ade6</i> -M210 <i>ura4</i> -D18 <i>leu1</i> -32 h-                           | This study |
| KGY243-2      | <i>its3</i> -mNG: <i>hyg</i> <sup>R</sup> <i>ade6</i> -M210 <i>leu1</i> -32 <i>ura4</i> -D18 h-                                                | This study |
| KGY473-2      | <i>its3</i> -mNG: <i>hyg</i> <sup>R</sup> <i>opy1::kan</i> <sup>R</sup> <i>ade6</i> -M210 <i>leu1</i> -32 <i>ura4</i> -D18 h+                  | This study |
| KGY446-2      | <i>its3</i> -mNG: <i>hyg</i> <sup>R</sup> <i>efr3::kan</i> <sup>R</sup> <i>ade6</i> -M210 <i>leu1</i> -32 <i>ura4</i> -D18 h+                  | This study |
| KGY510-2      | <i>its3</i> -mNG: <i>hyg</i> <sup>R</sup> <i>nmt1-opy1:ura</i> <i>ade6</i> -M210 <i>ura4-x leu1</i> -32 h-                                     | This study |
| KGY18661      | GFP- <i>stt4 ade6</i> -704 <i>leu1</i> -32 h-                                                                                                  | Lab stock  |
| KGY178-2      | GFP- <i>stt4 opy1::kan</i> <sup>R</sup> <i>ade6-x leu1</i> -32 <i>ura4</i> -D18 h-                                                             | This study |
| KGY167-2      | <i>opy1</i> -TAP: <i>kan</i> <sup>R</sup> <i>ade6</i> -M210 <i>ura4</i> -D18 <i>leu1</i> -32 h-                                                | This study |
| KGY19217      | GFP-P4C <sub>SidC</sub> : <i>leu</i> <sup>+</sup> <i>ade6</i> -M210 <i>leu1</i> -32 <i>ura4</i> -D18 h+                                        | Lab stock  |
| KGY3119-2     | GFP-P4C <sub>SidC</sub> : <i>leu</i> <sup>+</sup> <i>nmt1-opy1:ura leu1</i> -32 <i>ura4-x h+</i>                                               | This study |
| KGY2255-2     | GFP-PH <sub>Akt</sub> : <i>leu</i> <sup>+</sup> <i>ptn1::kan</i> <sup>R</sup> <i>ade6</i> -M210 <i>leu1</i> -32 <i>ura4</i> -D18 h-            | Lab stock  |
| KGY3193-2     | GFP-PH <sub>Akt</sub> : <i>leu</i> <sup>+</sup> <i>ptn1::kan</i> <sup>R</sup> <i>nmt1-opy1:ura ade6</i> -M210 <i>leu1</i> -32 <i>ura4-x h-</i> | This study |
| KGY269-2      | GFP-2xPH <sub>Plc</sub> : <i>leu</i> <sup>+</sup> <i>ade6</i> -M210 <i>leu1</i> -32 <i>ura4</i> -D18 h-                                        | Lab stock  |
| KGY3192-2     | GFP-2xPH <sub>Plc</sub> : <i>leu</i> <sup>+</sup> <i>nmt1-opy1:ura ade6</i> -M210 <i>leu1</i> -32 <i>ura4-x h-</i>                             | This study |
| KGY246        | <i>ade6</i> -M210 <i>ura4</i> -D18 <i>leu1</i> -32 h-                                                                                          | Lab stock  |
| KGY3117-2     | <i>nmt1-opy1:ura+</i> <i>ade6</i> -M210 <i>ura4</i> -294 <i>leu1</i> -32 h+                                                                    | This study |
| KGY18056      | <i>efr3::kan</i> <sup>R</sup> <i>ade6</i> -M210 <i>ura4</i> -D18 <i>leu1</i> -32 h-                                                            | Lab stock  |
| KGY1120-2     | <i>nmt1-opy1:ura+</i> <i>efr3::kan</i> <sup>R</sup> <i>ade6</i> -M210 <i>ura4-x leu1</i> -32 h-                                                | This study |
| KGY1898-2     | <i>opy1::ura+</i> <i>ade6</i> -M210 <i>ura4</i> -D18 <i>leu1</i> -32 h-                                                                        | This study |
| KGY796-2      | <i>syj1::kan</i> <sup>R</sup> <i>opy1::ura+</i> <i>ade6</i> -M210 <i>ura4</i> -D18 <i>leu1</i> -32 h+                                          | This study |

|           |                                                                                                                    |            |
|-----------|--------------------------------------------------------------------------------------------------------------------|------------|
| KGY872-2  | <i>syj2::kan<sup>R</sup> opy1::ura<sup>+</sup> ade6-M210 ura4-D18 leu1-32 h<sup>+</sup></i>                        | This study |
| KGY1977-2 | <i>opy1::ura<sup>+</sup> syj1::kan<sup>R</sup> syj2::kan<sup>R</sup> ade6-M210 ura4-D18 leu1-32 h<sup>-</sup></i>  | This study |
| KGY2184-2 | <i>opy1::ura<sup>+</sup> inp53::kan<sup>R</sup> ade6-M210 ura4-D18 leu1-32 h<sup>+</sup></i>                       | This study |
| KGY2495-3 | <i>opy1::ura<sup>+</sup> inp53::kan<sup>R</sup> syj2::kan<sup>R</sup> ade6-M210 ura4-D18 leu1-32 h<sup>-</sup></i> | This study |
| KGY1951-2 | <i>inp53::kan<sup>R</sup> ade6-M210 ura4-D18 leu1-32 h<sup>+</sup></i>                                             | Lab stock  |
| KGY2685-2 | <i>inp53::kan<sup>R</sup> syj2::kan<sup>R</sup> ade6-M210 ura4-D18 leu1-32 h<sup>-</sup></i>                       | Lab stock  |
| KGY1905-2 | <i>syj2::kan<sup>R</sup> ade6-M210 ura4-D18 leu1-32 h<sup>+</sup></i>                                              | Lab stock  |
| KGY2328-2 | <i>syj1::kan<sup>R</sup> syj2::kan<sup>R</sup> ade6-M210 ura4-D18 leu1-32 h<sup>+</sup></i>                        | Lab stock  |
| KGY18196  | <i>syj1::kan<sup>R</sup> ade6-M210 ura4-D18 leu1-32 h<sup>+</sup></i>                                              | Lab stock  |
| KGY1004-2 | <i>opy1::kan<sup>R</sup> ade6-M210 ura4-D18 leu1-32 h<sup>+</sup></i>                                              | Lab stock  |
| KGY6369   | <i>its3-1 ade6-M21x ura4-D18 leu1-32 h<sup>-</sup></i>                                                             | Lab stock  |
| KGY593-2  | <i>its3-1 opy1::kan<sup>R</sup> ade6-M21x ura4-D18 leu1-32 h<sup>-</sup></i>                                       | This study |

**Table S2. Proteins identified by LC-MS/MS in Opy1-TAP.** Proteins identified by LC-MS/MS in Opy1-TAP. Shown in the table are the ORF numbers (ID), protein names and their descriptions. Also indicated are the Total Spectral Counts (TSC), the percent of the protein's sequence that was identified (coverage) and the predicted molecular weight (MW) of each protein identified. Only proteins with a minimum of two spectral counts are shown and proteins identified in mock TAPs are listed at the end of the table in grey-shaded text.

[Click here to Download Table S2](#)

## References

**Harlan, J. E., Yoon, H. S., Hajduk, P. J. and Fesik, S. W.** (1995). Structural characterization of the interaction between a pleckstrin homology domain and phosphatidylinositol 4, 5-bisphosphate. *Biochemistry* **34**, 9859-9864.

**Madeira, F., Park, Y. M., Lee, J., Buso, N., Gur, T., Madhusoodanan, N., Basutkar, P., Tivey, A. R. N., Potter, S. C., Finn, R. D. et al.** (2019). The EMBL-EBI search and sequence analysis tools APIs in 2019. *Nucleic acids research* **47**, W636-W641.
